# Supplementary material for: Neutral and cationic biimidazoledihalogenobis(trimethylphosphine)rhenium(iii) complexes: ion-pairing, acid–base and redox propertiesElectronic supplementary information (ESI) available: details of the structure determination and refinement for compounds 4, 5, 7 and 9·OPPh3. See http://www.rsc.org/suppdata/dt/b1/b103719f/
Source: Royal Society of Chemistry journal article supplement (doi:10.1039/b103719f), 2001-11-15
Supplement: b103719f.doc [file b103719f.doc]

# Neutral and cationic biimidazoledihalogenobis(trimethylphosphine)­rhenium(III) complexes: ion-pairing, acid-base and redox properties

**SUPPLEMENTARY INFORMATION**

### Sébastien Fortin,a Paul-Louis Fabre,b Michèle Dartiguenaveb and André L. Beauchamp*,a

*a Département de Chimie, Université de Montréal, C. P. 6128, Succ. Centre-Ville, Montréal (QC), Canada, H3C 3J7. Email:* beauchmp@chimie.umontreal.ca

*b Laboratoire de Chimie Inorganique, Université Paul Sabatier, 118 route de Narbonne, 31062 Toulouse, France*

**Details of structure determination and refinement for the individual compounds.**

For **4**, despite a good stability on the benchtop, decomposition occurred quickly in the X-ray beam even at low temperature. One specimen happened to survive long enough to allow data to be collected over the whole sphere (**  70°). The Niggli parameters indicated a tetragonal *I-*centred cell. Laue symmetry was found to be 4/*m* by inspection of the complete data set. Since no systematic absences were noted besides those due to *I-*centring, space groups *I*4, and *I*4/*m* remained possible. A centrosymmetric space group was suggested by the good equivalence of the Friedel pairs. Thus, the structure was interpreted in the centric *I*4/*m* space group.

The complex was found to lie on a crystallographic mirror plane (equipoint 8*h*). All non-hydrogen atoms in the half-molecule were readily located and refined normally. However, the unit cell contained two symmetry-equivalent cavities centred at (0, 0, 1/2) and (1/2, 1/2, 0), respectively, containing a large amount of severely disordered solvent molecules. The *F* map showed 6 peaks of ~1 e–/Å3 in this region, but despite repeated attempts, no consistent model could be assembled. This is undoubtedly due to a combination of complicated disorder and large thermal motion. Therefore, this part of the structure was modelled by using the SQUEEZE procedure of the PLATON software,1 which indicated the presence of two cavities of 1488 Å3, each occupied by 208 electrons. Since recrystallization was carried out by diffusion of diethyl ether into a dichloromethane solution, each pocket could contain, on average, 3.2 ether and 1.6 CH2Cl2 molecules. This composition was used to calculate the derived quantities in Table 1. The contribution of the disordered solvent was calculated with the BYPASS procedure of van der Sluis and Spek2 and a new *hkl*/*F*o2 list bypassing the solvent contribution was generated. The final model consisting of the ordered part only, without the disordered solvent contribution, was refined against this new data list, which is the one provided with the CIF file. Refinement converged to *R* = 0.0413. The highest residuals were +1.31 and -0.81 e–/Å3 (within 1.2 Å from Re), whereas the general background was < |0.54| e–/Å3. Attempts to describe the structure in the non-centric *I*4 and space groups failed to provide a better model for solvent disorder and made refinement very unstable. Therefore, space group *I*4/*m* was retained.

For **5**, no symmetry higher than triclinic was indicated. The structure was solved in the centric space group. Again, the crystals generally decomposed rapidly when exposed to X‑rays and many crystals were tried. For the specimen used here, decomposition occurred only after a four-octant data set up to ** = 50° had been collected.

All non-hydrogen atoms in the complex were easily located and refined. However, the unit cell included a pocket filled with disordered solvent molecules near an inversion centre. The SQUEEZE procedure of PLATON1 indicated a cavity of 840 Å3 containing 189 electrons, which corresponds to 4.4 diethyl ether molecules. This part of the structure was modelled as above with the BYPASS procedure2 and the ordered part was refined. Convergence was reached for *R* = 0.039. The highest residuals were +0.90 and -0.66 e–/Å3 (near Re atoms).Attempts to solve the structure in the non-centric *P*1 space group failed.

Crystals of **7** and **9** are both monoclinic and their space group *P*21/*c* was uniquely defined from the systematic absences. Whole sphere of data were collected in both cases. These structures solved and refined normally. The absence of lattice solvent was confirmed by the VOID routine of PLATON.1 In the final *F* map of **7**, three peaks of 1.63-3.79 e–/Å3 were found within 1.0 Å from the Re atom, whereas the general background was < |0.74| e–/Å3. For **9**, three peaks of 1.03-2.00 e–/Å3 remained near the Re atom and the general background was < |0.74| e–/Å3.

1 A. L. Spek, PLATON, Molecular Geometry Program (July 1995 Version), University of Utrecht, Utrecht, The Netherlands, 1995.

2 P. van der Sluis and A. L. Spek, *Acta Crystallogr., Sect. A*, 1990, **46**, 194.
